# Supplementary material for: Experimental Infection of Peromyscus Species Rodents with Sin Nombre Virus
Source: PubMed Central journal article supplement (PMC9423932; doi:10.3201/eid2809.220509), 2022-09
Supplement: 22-0509-Techapp-s1.pdf [file 22-0509-Techapp-s1.pdf]

# Experimental Infection of *Peromyscus* Species Rodents with Sin Nombre Virus

## Appendix

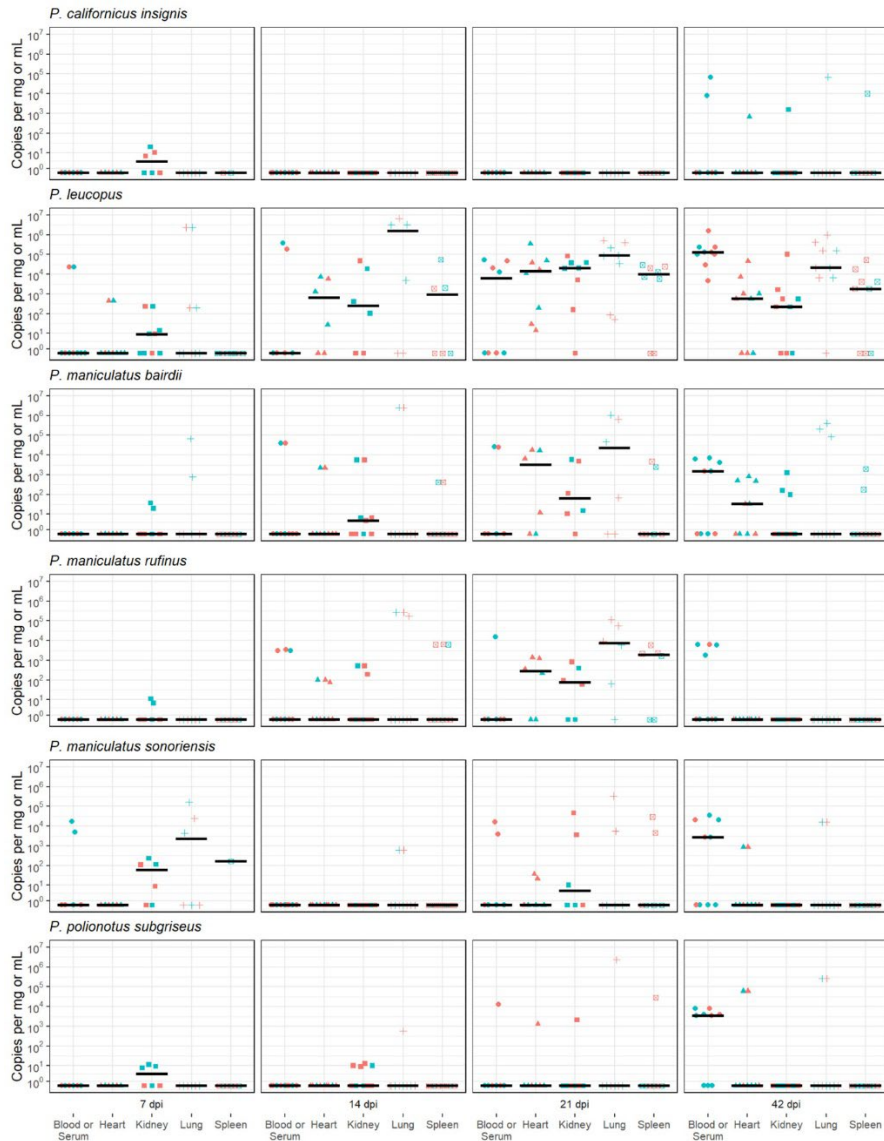

**Appendix Figure.** Detection of Sin Nombre orthohantavirus S segment RNA by quantitative reverse transcription PCR at 7, 14, 21, and 42 days postinfection (dpi) in various tissues. Horizontal bars denote median values. Serum samples were collected instead of blood on 21 dpi and 42 dpi for serologic analysis. Colors indicate sex: red for female, blue for male.
